# Supplementary material for: Luminescent Pb-free perovskites: low-cytotoxicity materials for primary thermal sensing
Source: Royal Society of Chemistry journal article supplement (doi:10.1039/d3tc00768e), 2023-01-01
Supplement: d3tc00768e1.pdf [file d3tc00768e1.pdf]

## Supporting Information

### **Luminescent Pb-free perovskites: low-cytotoxic materials for primary thermal sensing**

*Luan N. Passini<sup>1</sup>, Fernando E. Maturi<sup>2,3</sup>, Roberta S. Pugina<sup>4</sup>, Eloísa G. Hilário<sup>4</sup>, Marina Fontes<sup>5</sup>, Hernane S. Barud<sup>5</sup>, Luís D. Carlos<sup>2</sup>, José Maurício A. Caiut<sup>4</sup>, and Danilo Manzani<sup>1\*</sup>*

L. N. P., Prof. D. M.

<sup>1</sup>São Carlos Institute of Chemistry, University of São Paulo (USP), São Carlos, SP, 13560-970, Brazil

\*E-mail: [dmanzani@usp.br](mailto:dmanzani@usp.br)

F. E. M., Prof. L. D. C.

<sup>2</sup>Phantom-g, CICECO – Aveiro Institute of Materials, Department of Physics, University of Aveiro, Aveiro, 3810-193, Portugal

F. E. M.

<sup>3</sup>Institute of Chemistry, São Paulo State University (UNESP), Araraquara, SP, 14800-060, Brazil

Dr. R. S. P., E. G. H., Prof. J. M. A. C.

<sup>4</sup>Department of Chemistry, Faculty of Philosophy, Sciences and Letters, University of São Paulo (USP), Ribeirão Preto, SP, 14040-901, Brazil

M. F., Prof. H. S. B.

<sup>5</sup>BioPolMat – Biopolymers and Biomaterials Research Group, University of Araraquara (UNIARA), Araraquara, SP, 14801-040, Brazil

**Keywords:** perovskites, lead-free perovskites, upconversion luminescence, thermometry, cytotoxicity

### **Table of Contents**

|                                                                                     |   |
|-------------------------------------------------------------------------------------|---|
| S1. Scanning electron microscopy .....                                              | 2 |
| S2. Optical properties of the co-doped In-based perovskites .....                   | 3 |
| S3. Thermometric performance of the luminescent co-doped In-based perovskites ..... | 6 |
| S4. Energy gap and power-dependent intensity ratio .....                            | 7 |

## S1. Scanning electron microscopy

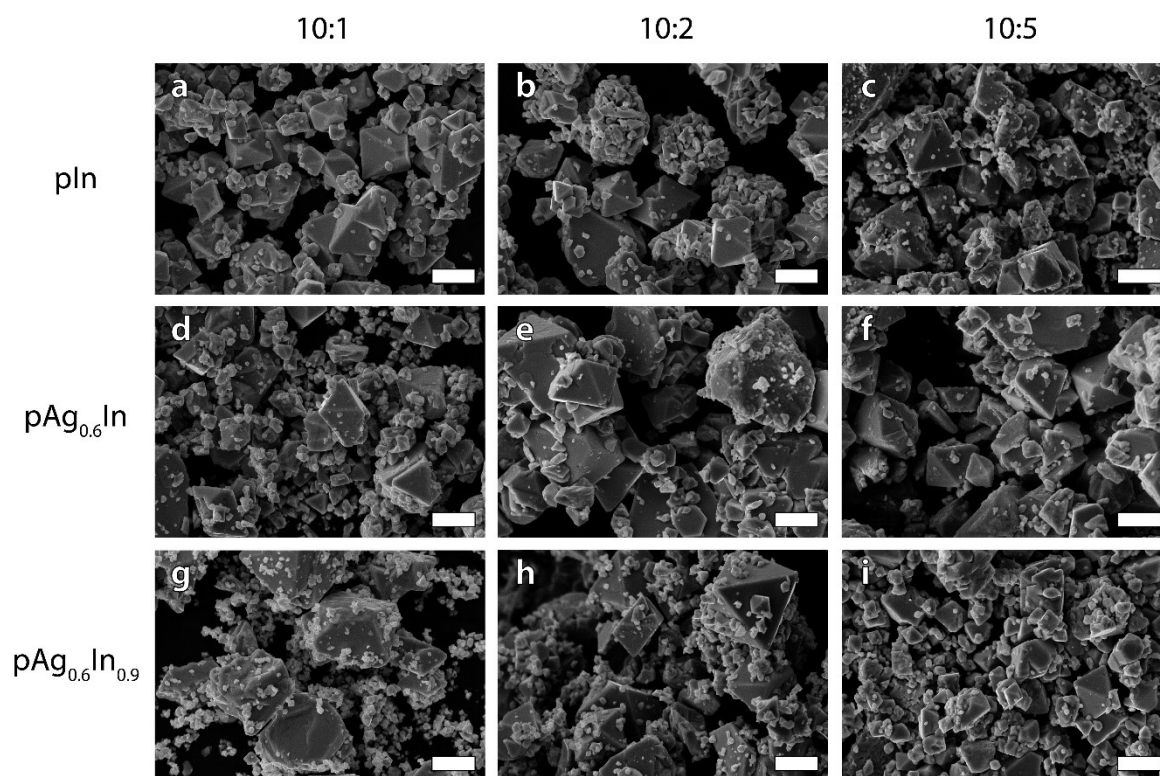

**Figure S1.** SEM micrographs of the pIn<sub>0.9</sub> (a, b, and c), pAg<sub>0.6</sub>In (d, e, and f), and pAg<sub>0.6</sub>In<sub>0.9</sub> (g, h, and i) perovskites co-doped with Yb<sup>3+</sup>/Er<sup>3+</sup> at 10:1, 10:2, and 10:5 doping ratios. The scale bar is 10  $\mu$ m for all the panels.

## S2. Optical properties of the co-doped In-based perovskites

**Table S1.** Calculated energy band gap of Ln<sup>3+</sup>-doped samples.

| Yb <sup>3+</sup> /Er <sup>3+</sup> ratio | pIn <sub>0.9</sub>        |                           | pAg <sub>0.6</sub> In     |                           | pAg <sub>0.6</sub> In <sub>0.9</sub> |  |
|------------------------------------------|---------------------------|---------------------------|---------------------------|---------------------------|--------------------------------------|--|
|                                          | $E_{g1}$ [ $\pm 0.03$ eV] | $E_{g2}$ [ $\pm 0.03$ eV] | $E_{g1}$ [ $\pm 0.03$ eV] | $E_{g1}$ [ $\pm 0.03$ eV] | $E_{g2}$ [ $\pm 0.03$ eV]            |  |
| 10:1                                     | 3.36                      | 2.96                      | 3.65                      | 3.44                      | 2.80                                 |  |
| 10:2                                     | 3.40                      | 2.99                      | 3.65                      | 3.38                      | 2.95                                 |  |
| 10:5                                     | 3.42                      | 3.00                      | 3.65                      | 3.30                      | 2.96                                 |  |

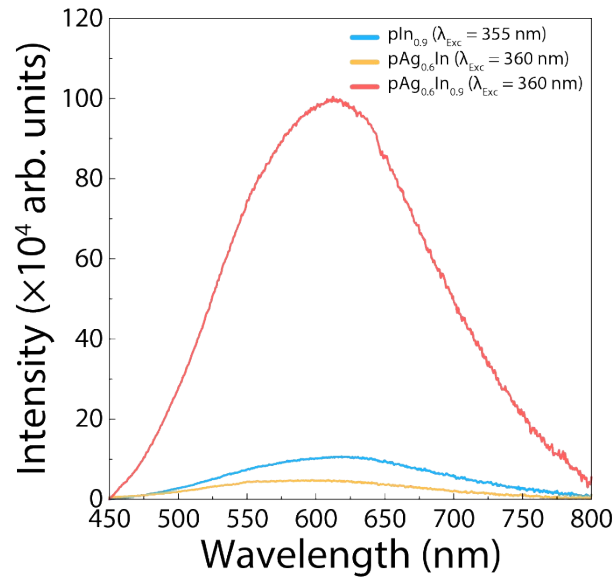

**Figure S2.** Comparison of the emission spectra of the pIn<sub>0.9</sub> (blue), pAg<sub>0.6</sub>In (yellow), and pAg<sub>0.6</sub>In<sub>0.9</sub> (red) samples under excitation at 355, 360, and 360 nm, respectively.

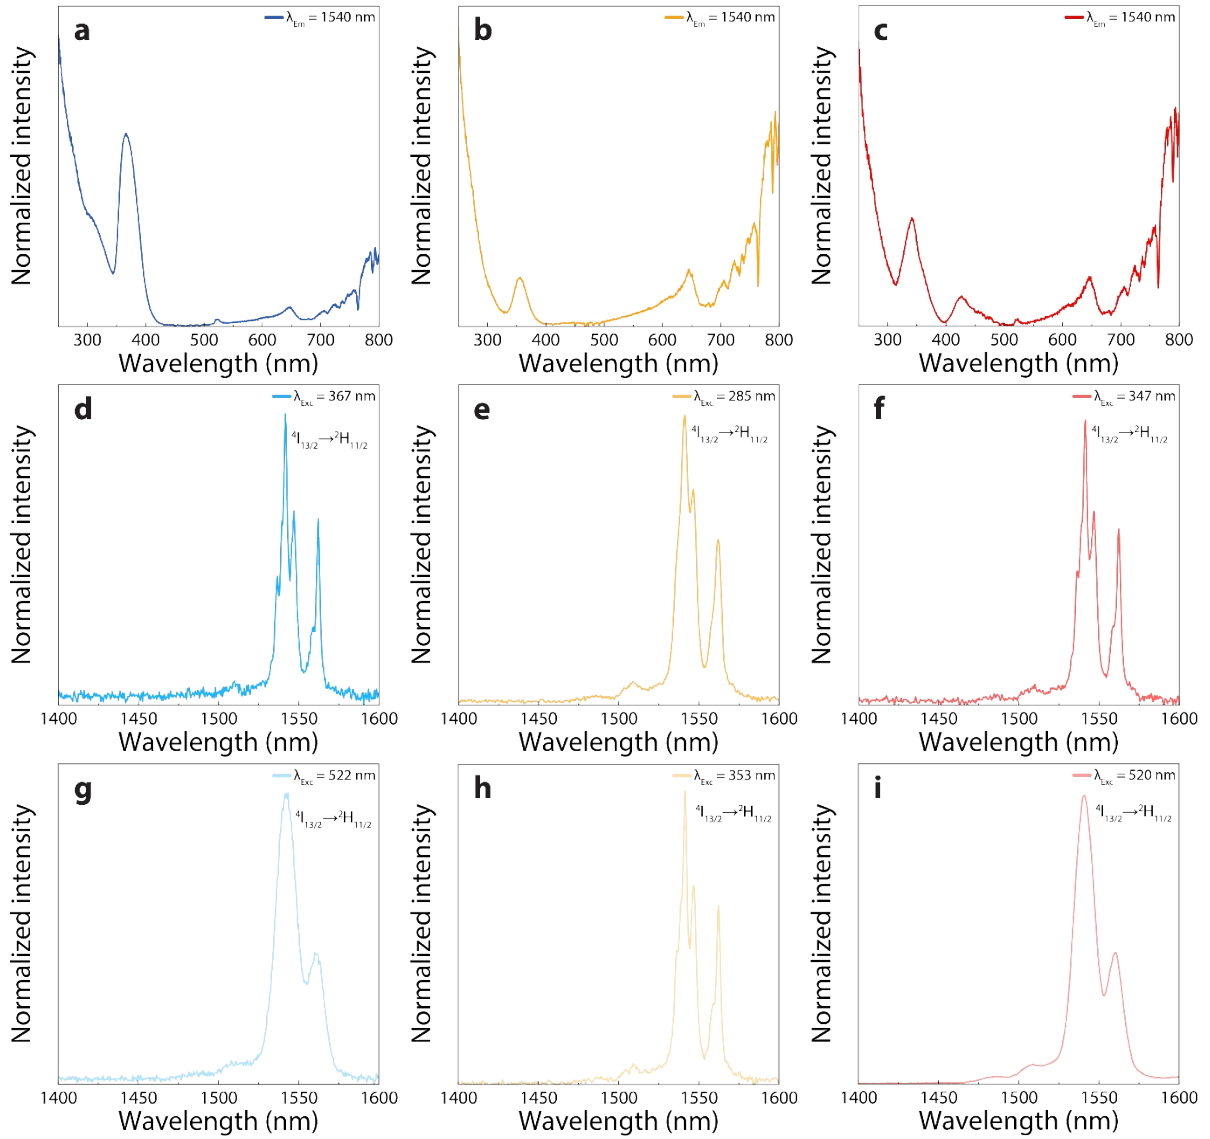

**Figure S3.** Excitation spectra of the (a) pIn<sub>0.9</sub>, (b) pAg<sub>0.6</sub>In, (c) and pAg<sub>0.6</sub>In<sub>0.9</sub> samples doped with Yb<sup>3+</sup>/Er<sup>3+</sup> (10:5) monitoring the emission at 1540 nm. Emission spectra of the (d) pIn<sub>0.9</sub>, (e) pAg<sub>0.6</sub>In, (f) and pAg<sub>0.6</sub>In<sub>0.9</sub> samples doped with Yb<sup>3+</sup>/Er<sup>3+</sup> (10:5) under excitation at 367, 285, and 347 nm, respectively. Emission spectra of the (d) pIn<sub>0.9</sub>, (e) pAg<sub>0.6</sub>In, (f) and pAg<sub>0.6</sub>In<sub>0.9</sub> samples doped with Yb<sup>3+</sup>/Er<sup>3+</sup> (10:5) under excitation at 522, 353, and 520 nm, respectively.

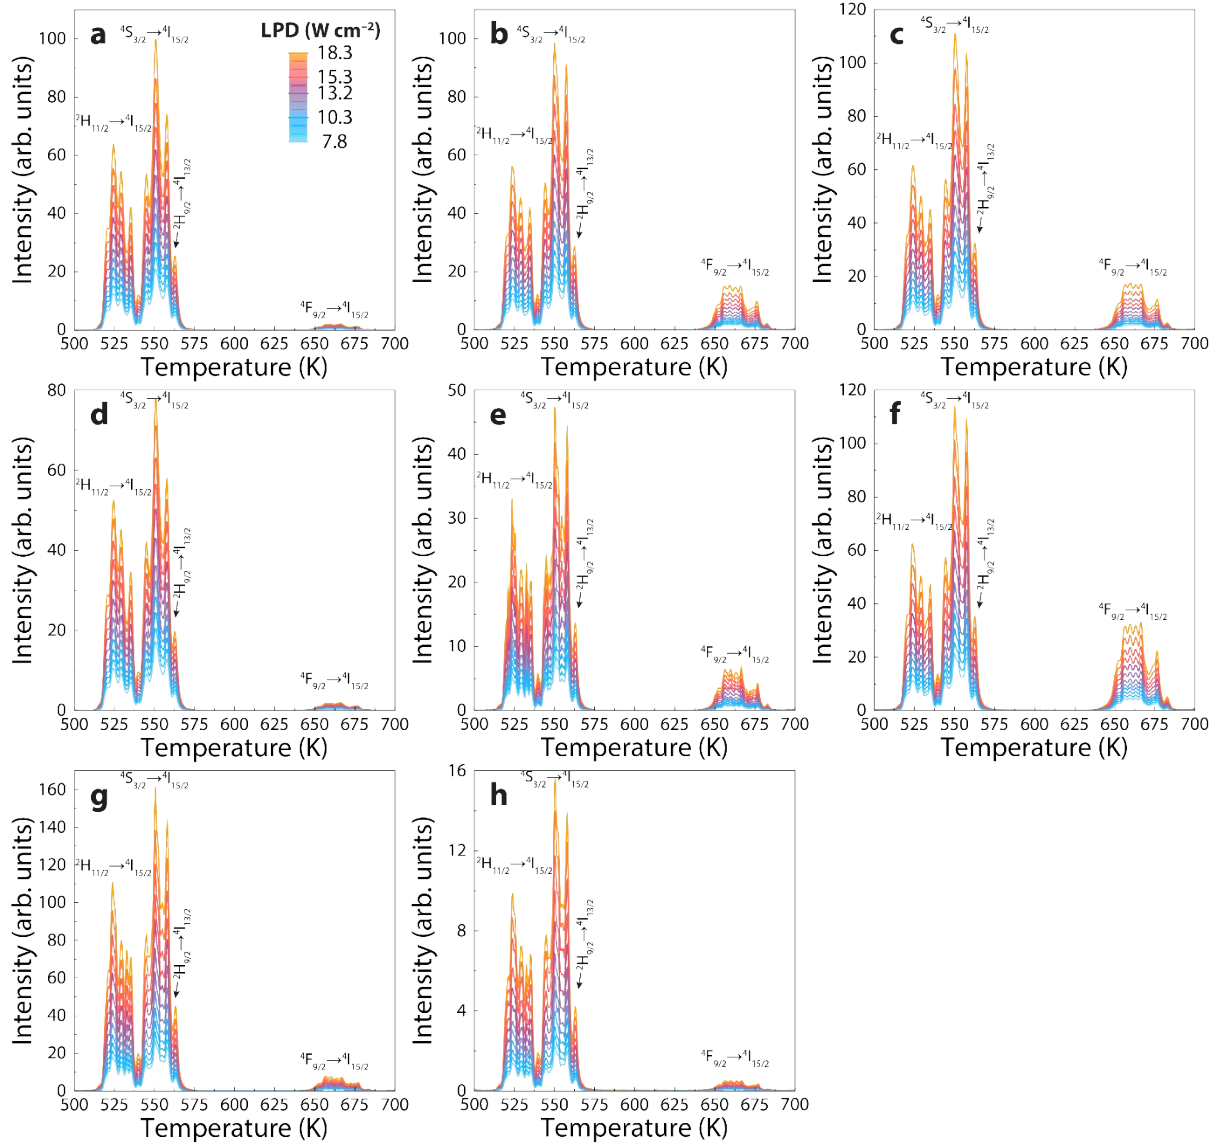

**Figure S4.** Upconverting emission spectra of In-based perovskite of (a)  $\text{pIn}_{0.9}$ , (b)  $\text{pAg}_{0.6}\text{In}$ , and (c)  $\text{pAg}_{0.6}\text{In}_{0.9}$  samples co-doped with  $\text{Yb}^{3+}/\text{Er}^{3+}$  at 10:1; (d)  $\text{pIn}_{0.9}$ , (e)  $\text{pAg}_{0.6}\text{In}$ , and (f)  $\text{pAg}_{0.6}\text{In}_{0.9}$  samples co-doped with  $\text{Yb}^{3+}/\text{Er}^{3+}$  at 10:2; and (g)  $\text{pAg}_{0.6}\text{In}$  and (h)  $\text{pAg}_{0.6}\text{In}_{0.9}$  co-doped with  $\text{Yb}^{3+}/\text{Er}^{3+}$  at 10:5. All samples were excited using a 980 nm CW laser varying its laser power density (LPD) from 7.8 to 18.3  $\text{W cm}^{-2}$ .

### S3. Thermometric performance of the luminescent co-doped In-based perovskites

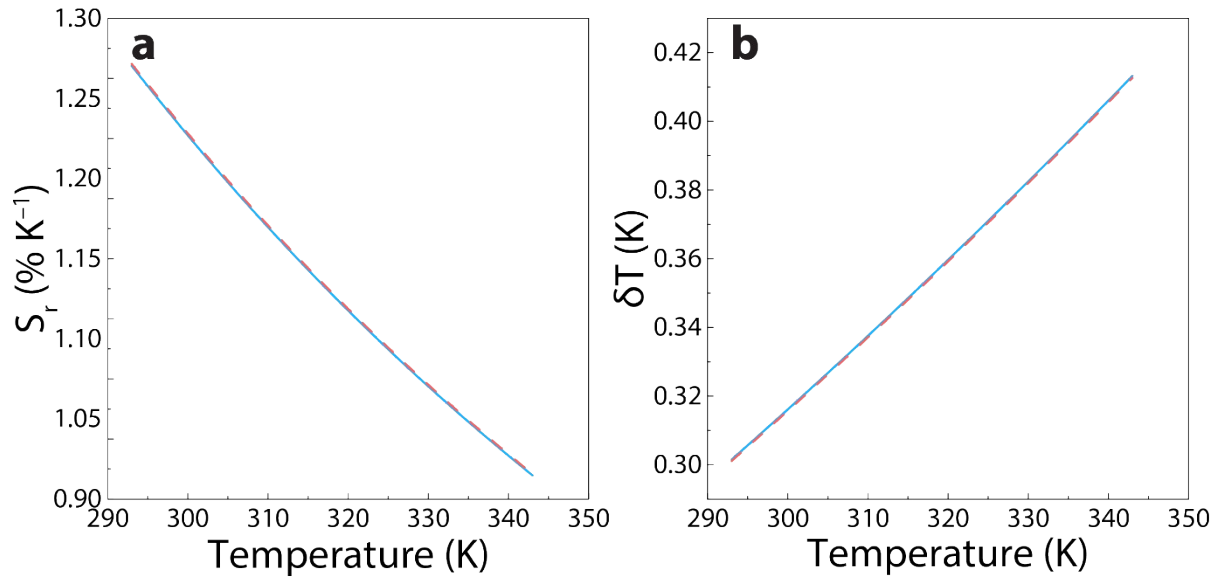

**Figure S5.** Thermal evolution of the (a) relative thermal sensitivity and (b) uncertainty in temperature for the obtained samples. The blue solid lines represent the results regarding the samples with a  $\Delta E = 752 \pm 10 \text{ cm}^{-1}$  ( $\text{pAg}_{0.6}\text{In}_{0.9}:\text{Yb}^{3+}/\text{Er}^{3+}$  (10:1),  $\text{pAg}_{0.6}\text{In}_{0.9}:\text{Yb}^{3+}/\text{Er}^{3+}$  (10:5),  $\text{pAg}_{0.6}\text{In}:\text{Yb}^{3+}/\text{Er}^{3+}$  (10:1),  $\text{pAg}_{0.6}\text{In}:\text{Yb}^{3+}/\text{Er}^{3+}$  (10:2),  $\text{pAg}_{0.6}\text{In}:\text{Yb}^{3+}/\text{Er}^{3+}$  (10:5), and  $\text{pIn}_{0.9}:\text{Yb}^{3+}/\text{Er}^{3+}$  (10:1)) and the red dashed lines represent the results regarding the samples with a  $\Delta E = 753 \pm 10 \text{ cm}^{-1}$  ( $\text{pAg}_{0.6}\text{In}_{0.9}:\text{Yb}^{3+}/\text{Er}^{3+}$  (10:2),  $\text{pIn}_{0.9}:\text{Yb}^{3+}/\text{Er}^{3+}$  (10:2), and  $\text{pIn}_{0.9}:\text{Yb}^{3+}/\text{Er}^{3+}$  (10:5)).

#### S4. Energy gap and power-dependent intensity ratio

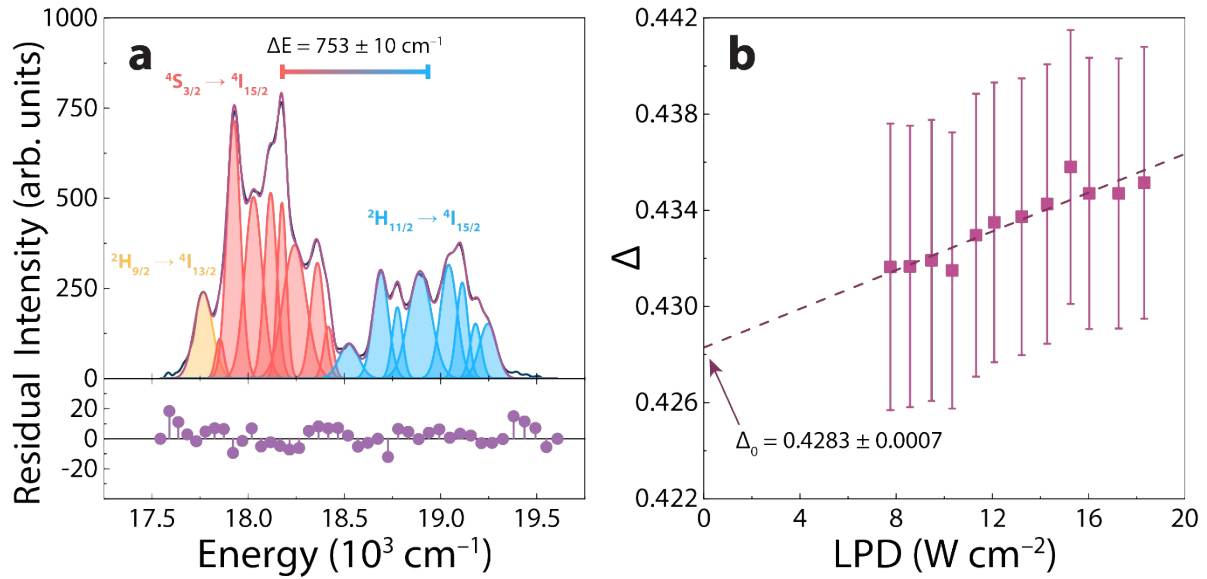

**Figure S6.** (a) Spectral Gaussian deconvolution illustrated for the emission spectrum of the  $\text{pAg}_{0.6}\text{In}_{0.9}\text{:Yb}^{3+}/\text{Er}^{3+}$  (10:2) sample measured at 273 K and  $18.3 \text{ W cm}^{-2}$  under 980 nm excitation. The shadowed areas correspond to the Gaussian fit to the Stark components of the  $^4S_{3/2} \rightarrow ^4I_{15/2}$  (red) and  $^2H_{11/2} \rightarrow ^4I_{15/2}$  (blue) transitions of  $\text{Er}^{3+}$ , where their respective barycenters were used to calculate  $\Delta E$ . The  $^2H_{9/2} \rightarrow ^4I_{13/2}$  transition is depicted in yellow. The bottom part demonstrates the residuals of the fitting procedure. (b) Determination of  $\Delta_0$  for the  $\text{pAg}_{0.6}\text{In}_{0.9}\text{:Yb}^{3+}/\text{Er}^{3+}$  (10:2) sample. The power dependence of  $\Delta$  was analyzed by plotting  $\Delta$  against the laser power density (LPD) of the excitation laser.
